## Limitations in next-generation sequencing-based genotyping of breast cancer polygenic risk score loci

Alexandra Baumann<sup>1</sup>, Christian Ruckert<sup>2</sup>, Christoph Meier<sup>3</sup>, Tim Hutschenreiter<sup>1</sup>, Robert Remy<sup>4</sup>, Benedikt Schnur<sup>5</sup>, Marvin Döbel<sup>6</sup>, Rudel Christian Nkouamedjo Fankep<sup>4</sup>, Dariush Skowronek<sup>7</sup>, Oliver Kutz<sup>1</sup>, Norbert Arnold<sup>8</sup>, Anna-Lena Katzke<sup>5</sup>, Michael Forster<sup>8</sup>, Anna-Lena Kobiela<sup>4</sup>, Katharina Thiedig<sup>9</sup>, Andreas Zimmer<sup>10</sup>, Julia Ritter<sup>11</sup>, Bernhard H.F. Weber<sup>3,12</sup>, Ellen Honisch<sup>13</sup>, Karl Hackmann<sup>1</sup>, Bioinformatics Working Group of the German Consortium for Hereditary Breast & Ovarian Cancer<sup>\*</sup>, Gunnar Schmidt<sup>5</sup>, Marc Sturm<sup>6</sup> & Corinna Ernst<sup>4</sup>

<sup>1</sup>Institute for Clinical Genetics, University Hospital Carl Gustav Carus at TU Dresden, Dresden, Germany; ERN GENTURIS, Hereditary Cancer Syndrome Center Dresden, Germany; National Center for Tumor Diseases Dresden (NCT/UCC), Germany; German Cancer Research Center (DKFZ), Heidelberg, Germany; Faculty of Medicine and University Hospital Carl Gustav Carus at TU Dresden, Dresden, Germany; German Cancer Consortium (DKTK), Dresden, Germany; German Cancer Research Center (DKFZ), Heidelberg, Germany; Max Planck Institute of Molecular Cell Biology and Genetics, Dresden, Germany

<sup>2</sup>Institute of Human Genetics, University of Münster, Münster, Germany

<sup>3</sup>Institute of Human Genetics, University of Regensburg, Regensburg, Germany

<sup>4</sup>Center for Familial Breast and Ovarian Cancer, Center for Integrated Oncology (CIO), Medical Faculty, University of Cologne and University Hospital Cologne, Cologne, Germany

<sup>5</sup>Department of Human Genetics, Hannover Medical School (MHH), Hannover, Germany

<sup>6</sup>Institute of Medical Genetics and Applied Genomics, University Hospital Tübingen, Tübingen, Germany

<sup>7</sup>Department of Human Genetics, University Medicine Greifswald and Interfaculty Institute of Genetics and Functional Genomics, University of Greifswald, Greifswald, Germany

<sup>8</sup>Department of Gynecology and Obstetrics, Institute of Clinical Chemistry Institute of Clinical Molecular Biology, University Hospital Schleswig-Holstein, Campus Kiel, Kiel, Germany

<sup>9</sup>Division of Gynaecology and Obstetrics, Klinikum rechts der Isar der Technischen Universität München, München, Germany

<sup>10</sup>Institute for Human Genetics, Medical Center University of Freiburg, Faculty of Medicine, University of Freiburg, Freiburg, Germany

<sup>11</sup>Department of Human Genetics, Labor Berlin – Charité Vivantes GmbH, Berlin, Germany

<sup>12</sup>Institute of Clinical Human Genetics, University Hospital Regensburg, Regensburg, Germany

<sup>13</sup>Department of Gynaecology and Obstetrics, University Hospital Düsseldorf, Heinrich-Heine University Düsseldorf, Düsseldorf, Germany

\* A list of authors and their affiliations appears at the end of the paper.

## 1 **Abstract**

2 Considering polygenic risk scores (PRSs) in individual risk prediction is increasingly becoming the standard in  
3 genetic testing for hereditary breast cancer (BC). To calculate individual BC risks, the Breast and Ovarian  
4 Analysis of Disease Incidence and Carrier Estimation Algorithm (BOADICEA) with inclusion of the BCAC 313 or  
5 the BRIDGES 306 BC PRS is commonly used. Meaningful incorporation of PRSs relies on reproducing the allele  
6 frequencies (AFs), and hence, the distribution of PRS values, expected by the algorithm. Here, the 324 loci of  
7 the BCAC 313 and the BRIDGES 306 BC PRS were examined in population-specific database gnomAD and in  
8 real-world data sets of five centers of the German Consortium for Hereditary Breast and Ovarian Cancer (GC-  
9 HBOC), to determine whether these expected AFs are achieved with next-generation sequencing-based  
10 genotyping. Four PRS loci were non-existent in gnomAD v3.1.2 non-Finnish Europeans, further 24 loci showed  
11 noticeably deviating AFs. In real-world data, between 16 and up to 22 loci were reported with noticeably  
12 deviating AFs, and were shown to have effects on final risk prediction. Deviations depended on sequencing  
13 approach, variant caller and calling mode (forced versus unforced) employed. Therefore, this study  
14 demonstrates the necessity to apply quality assurance not only in terms of sequencing coverage but also  
15 observed AFs in a sufficiently large sample, when implementing PRSs in a routine diagnostic setting.  
16 Furthermore, future PRS design should be guided by reproducibility of expected AFs in addition to the  
17 observed effect sizes.

18

19 Keywords: polygenic risk score, breast cancer, next-generation sequencing

20

## 21 Introduction

22 The German Consortium for Hereditary Breast and Ovarian Cancer (GC-HBOC) is a consortium of  
23 interdisciplinary university centers specialized in providing counseling, genetic testing and healthcare for  
24 individuals at risk for familial breast and ovarian cancer (BC/OC). Clinical management of women found to be  
25 at increased risk for BC/OC, due to inherited pathogenic variants in established BC/OC risk genes or a strong  
26 family history of cancer, demands for accurate and age-dependent risk estimates. Numerous studies  
27 demonstrated that the effects of BC susceptibility loci, i.e., common single nucleotide variants (SNVs) and short  
28 indels, which individually contribute only slightly to individual BC risks, but whose effects can be summed up  
29 to polygenic risk scores (PRSs) which can achieve a clinically relevant degree of BC risk discrimination [1 – 3]. As  
30 the contribution of the PRS to BC risks has also been confirmed for carriers of a pathogenic variant in moderate-  
31 to high-penetrant BC risk genes [4 – 7], inclusion of PRSs in individual BC risk prediction is increasingly  
32 becoming standard in GC-HBOC centers [8].

33 The Breast and Ovarian Analysis of Disease Incidence and Carrier Estimation Algorithm (BOADICEA), which is  
34 implemented in the CE-marked CanRisk web interface, provides (since v5) the straightforward inclusion of  
35 genetic germline test results, cancer family history, non-genetic risk factors and PRSs in a comprehensive  
36 model [9, 10]. It is therefore widely applied for individual BC risk prediction in routine diagnostics of the GC-  
37 HBOC centers. The CanRisk web interface allows the specification of individual PRSs either as manual input  
38 (including specification of the square root of the proportion of the overall polygenic variance explained) or, for a  
39 given set of PRSs, via upload of a VCF file with the genotype or dosage information per locus to consider.  
40 Whichever method is chosen, genotyping is the responsibility of the user. For PRSs for which VCF upload is  
41 supported, CanRisk provides specifications for incorporated loci, each including the variant (chromosome,  
42 genomic position for hg19, reference and effect allele), log odds ratio (i.e., effect size) and expected AF [11]. The  
43 given alleles and AFs arise from high-throughput genotyping using one of two arrays, iCOGS13 or OncoArray  
44 [2].

45 In the GC-HBOC centers, the BCAC 313 BC PRS, and its modified version, the BRIDGES 306 BC PRS [12],

46 are the preferred PRS variant sets employed for BC risk prediction. The genetic germline testing and  
47 genotyping of PRS loci is based on next-generation sequencing (NGS), e.g., using the TruRisk™ or further  
48 specifically adapted multigene panels, whole-exome or whole-genome sequencing (WGS). The BRIDGES 306  
49 BC PRS excludes loci of the original BCAC 313 BC PRS that were found not to be appropriately designable  
50 using NGS, some of which were replaced by corresponding loci in linkage disequilibrium [12]. The assessment  
51 of designability was mainly based on sufficient read coverage for diagnostic purposes when using a multigene  
52 panel approach and mapping to human reference hg19. With the implementation of BC PRS analysis in  
53 routine diagnostics and the establishment of corresponding bioinformatic workflows, further technical  
54 challenges besides insufficient coverage were identified, e.g., missing variant calls or variant calling resulted in  
55 deviating alleles. Studies systematically assessing and comparing quality and pitfalls of germline genotyping  
56 using either arrays or NGS approaches, are rare and mainly date from the early days of the establishment of  
57 NGS in clinical diagnostics [13 – 16]. Hence, it cannot be excluded that the conclusions drawn (which were  
58 also contradictory with regard to NGS or array being the more reliable and preferable approach) were based  
59 on now predominantly outdated technologies. Nevertheless, it is well-known that accuracy of NGS tend to be  
60 hampered in genomic regions of low complexity, i.e., homopolymer runs, tandem repeats and strongly biased  
61 GC contents, among others [17 – 19]. In the Genome Aggregation Database (gnomAD), the largest and most  
62 widely used population-specific variant database, variants located in so-called low-complexity regions are  
63 flagged, to indicate that reported AFs may be erroneous [20, 21].

64 In this study, the Bioinformatics Working Group of the GC-HBOC conducted a systematic evaluation across  
65 GC-HBOC centers to develop a detailed, locus-wise assessment of technical pitfalls and possible sources of  
66 error in NGS-based PRS genotyping. A three-stage approach was followed. First, the AF of PRS variants were  
67 compared to the gnomAD AF for the European general population and it was checked if the variants can be  
68 converted to the hg38 reference genome. Second, PRS variant AFs in real-world data sets provided by  
69 participating GC-HBOC centers were compared to the AFs expected by CanRisk. Third, possible workarounds  
70 for use in clinical diagnostics, i.e., usage of alternative alleles and proxys, were identified. The presented

71 results are of relevance beyond diagnostics for BC risk prediction, as they demonstrate principle difficulties in  
72 NGS-based PRS computation, especially for PRSs developed based on array data. Furthermore, the results  
73 underline the necessity of a comprehensive technical evaluation of PRS variant genotyping in clinical use, as  
74 the predictive ability of an individual PRS crucially depends on the assumptions made about the underlying  
75 AFs.

76

## 77 **Materials and Methods**

### 78 **Evaluation of expected allele frequencies & convertibility to hg38**

79 Two BC PRS variant sets were considered, namely of the BCAC 313 and the BRIDGES 306 BC PRS. Of the two  
80 sets, 295 loci are identical, 18 loci are unique to BCAC 313 BC PRS, and further 11 loci are unique to the  
81 BRIDGES 306 BC PRS, resulting in a total number of  $N = 324$  variants to be considered. Expected AFs were  
82 extracted from the corresponding PRS specification files at the CanRisk knowledge base [11]. Additionally, AFs  
83 for non-Finnish Europeans (NFEs) were obtained from the gnomAD v3.1.2 database<sup>1</sup>, which are based on  
84 more than 33,000 WGS samples mapped to the hg38 reference sequence. For conversion of the hg19-based  
85 PRS variants from CanRisk to hg38, the gnomAD liftover feature was used.

86 Besides AFs, gnomAD flags and warnings indicating possible technical artifacts were retrieved and recorded.  
87 These included localization within low-complexity regions, low-quality sites (i.e., sites that are covered in less  
88 than 50% of considered samples [20]) and sites not passing the allele-specific GATK Variant Quality Score  
89 Recalibration (VQSR) filter.

90

### 91 **Determination of deviating allele frequencies**

92 To determine PRS variants with considerably deviating AFs, thresholds had to be defined dependent on  
93 sample sizes and variances observed. Therefore, individual thresholds per data set were determined, using an

---

<sup>1</sup> <https://gnomad.broadinstitute.org>

94 elbow of the curve method. The absolute differences between observed and expected AFs were sorted in  
95 descending order, and the absolute difference referring to the point with the largest Euclidean distance to the  
96 imaginary line between thought points (0, 1) and (N + 1, 0), were chosen as threshold, i.e., all observed  
97 absolute differences greater than this threshold were determined as noticeably deviating. Corresponding  
98 curves are shown in Supplementary Figures 1 to 6. If the same set of samples was processed with two  
99 different variant callers, the smaller threshold was applied in each case, to facilitate comparing variant caller  
100 performance.

101

### 102 **Real-world data collection**

103 Genotyping results for either BCAC 313 or BRIDGES 306 BC PRS loci in a sample of at least 100 individuals of  
104 European ancestry were requested from GC-HBOC centers. Participating centers submitted observed AFs per  
105 locus as well as fractions of samples that did not meet required quality criteria (e.g., with regard to minimum  
106 read depth). Furthermore, details on sequencing approaches and bioinformatic analysis workflows for PRS  
107 genotyping were systematically recorded.

108 In total, five GC-HBOC centers provided data, namely the Institute of Medical Genetics and Applied Genomics  
109 (IMGAG), University Hospital Tübingen, the Institute for Clinical Genetics (ICG), University Hospital Carl Gustav  
110 Carus Dresden, the Institute of Human Genetics at the University of Münster (IHG-M), the Center for Familial  
111 Breast and Ovarian Cancer (CFBOC), University Hospital Cologne, and the Institute of Human Genetics at the  
112 University of Regensburg (IHG-R). Each center provided two NGS-based data sets. An overview on data  
113 characteristics is given in Table 1. A more detailed description of sample compositions, sequencing  
114 approaches and bioinformatic analyses can be found in Supplementary Methods.

115

### 116 **Assessment of effects of deviating allele frequencies on estimated breast cancer risks**

117 Effects of noticeably deviating AFs of PRS loci on CanRisk-based estimated BC risks, rely on a multitude of  
118 factors, such as the number and combination of affected loci, and additional risk factors such as results of

119 germline testing of established BC/OC risk genes, BC/OC family history, non-genetic risk factors and current  
120 age. In principle, the effect of the PRS on BC risk is expected to be decreased in carriers of a pathogenic  
121 germline variant in a BC risk gene with moderate or high penetrance, and furthermore, its effect is expected to  
122 decrease with age [10]. In order to get an estimate of expected biases in predicted BC risks due to potentially  
123 erroneous PRS genotyping, estimates of 10 year and remaining lifetime risks, i.e., cumulative risks of primary  
124 BC until age of 80 years, were calculated using the CanRisk web interface for imaginary cancer-unaffected  
125 women of three different ages, namely 20, 40, and 60 years, without any further information than (artificial)  
126 PRS.

127 To simulate different scenarios, artificial VCF files were constructed with an average PRS (50th percentile) by  
128 using two times the expected CanRisk AF, i.e., expected dosage. For each data set, for loci showing noticeably  
129 deviating AFs, expected dosages were replaced by two times the observed AF in the data set. Dates of birth  
130 were set to January 1 in 2003, 1983, and 1963, to simulate 20, 40, and 60 years of age at time of risk  
131 computation, which were performed in October 2023, using CanRisk v2.3.5.

132

### 133 **Elaboration of workarounds**

134 Potential solutions for improving genotyping performance with respect to expected AFs could be (besides  
135 improving the calling itself) the consideration of alternative alleles or proxys. Details on the identification of  
136 potential variants to substitute for this purpose are given in Supplementary Methods. Alternative variants in  
137 gnomAD v.3.1.2 with an AF matching the expected CanRisk AF, were further evaluated using the IMGAG  
138 freebayes data, as this (i) was the largest data set in the study (n=1410), and (ii) the only WGS-based data set,  
139 which allowed genotyping of the entire set of putative proxys.

140

## 141 **Results**

### 142 **Missing loci & convertibility to hg38**

143 For four BC PRS loci, no variants were listed at the specified genomic position in gnomAD v2.1.1, namely  
144 rs572022984, rs113778879, rs73754909, and rs79461387. gnomAD v3.1.2 also reported no variants for three of  
145 these four loci for corresponding loci in hg38 as defined by dbSNP [22] (Supplementary Table 1). Locus  
146 rs572022984 was listed, but with an overall allele count of zero in NFE samples (Table 2).

147 For two loci, conversion to hg38 resulted in a change in alleles, namely for rs143384623 (hg19: 1-145604302-  
148 C-CT; hg38: 1-145830798-C-CA) and rs550057 (hg19: 9-136146597-C-T; hg38: 9-133271182-T-C). For  
149 rs143384623, the change of the alternative allele from CT to CA did not result in a noticeable shift in AFs  
150 observed in gnomAD NFE samples (5142/13304 (0.39) in v2.1.1 versus 24316/64610 (0.38) in v3.1.2, two-  
151 sided Fisher's exact test  $p = 0.14$ ). For rs550057, the observed AFs appeared exactly opposite, i.e.,  
152 3786/14828 (0.26) for allele T in gnomAD v2.1.1 and 49878/67552 (0.74) for allele C in gnomAD v3.1.2.  
153 Therefore,  $1 - 49878/67552$  was assumed as the gnomAD v3.1.2 effect AF at this bi-allelic site.

154

### 155 **Allele frequencies & technical artifacts reported in gnomAD v3.1.2**

156 For 39 of the 320 PRS loci listed with  $AF > 0$  in gnomAD v3.1.2, at least one observation of technical artifacts was  
157 reported: 38 loci were flagged as being located in low complexity regions, three as being localized at a low-  
158 quality site, and one failed the allele-specific VQSR filter (Supplementary Table 1).

159 Due to the absolute difference threshold 0.016 (Supplementary Figure 1), 24 loci were determined as showing  
160 deviating AFs compared to CanRisk (Figure 1, Table 2). Absolute differences ranged from 0.03 to 0.71, and for  
161 21 out of these 24 loci (87.5%), technical artifacts were reported in gnomAD v3.1.2.

162

### 163 **Evaluation of real-world next-generation sequencing outcome**

164 All 50 PRS loci for which a noticeably deviating AF was observed in at least one of the data sets provided by  
165 the five participating GC-HBOC centers are listed in Table 3.

166 For the IMGAG DRAGEN data, 0.052 was calculated as threshold to determine noticeably deviating AFs  
167 (Supplementary Figure 2), resulting in 18 loci affected (Table 3, Figure 2). Of these, 16 were previously also



168 identified as missing or showing noticeably deviating AFs in gnomAD v3.1.2. The exceptions were rs62485509  
169 and rs9931038. For IMGAG freebayes data, 0.036 was calculated as threshold (Supplementary Figure 2),  
170 resulting in 16 loci from the BCAC 313 BC PRS determined as showing a noticeably deviating AF. Of these, 11  
171 loci were also identified as showing deviating AF in IMGAG DRAGEN data, and all but rs12406858 and  
172 rs11268668 were previously identified as missing or showing deviating AFs in gnomAD v3.1.2.

173 Considering genotyping data provided by ICG, 23 of the overall 324 PRS loci did not meet the minimum  
174 quality criteria (read depth  $\geq 20$ ) in more than 25% of samples and were discarded (Supplementary Table 2).  
175 Additionally, GATK reported read depth  $< 20$  for  $> 25\%$  of samples for rs143384623. For 266 of the remaining  
176 300 PRS loci (88.67%), forced genotyping with GATK and freebayes resulted in observation of identical AFs. For  
177 both ICG GATK and freebayes data, 0.053 was calculated as threshold to determine noticeably deviating AFs  
178 (Supplementary Figure 3). Using this threshold, 19 loci showed noticeably deviating AFs in each dataset  
179 (including two loci exclusive for BCAC 313 BC PRS), with an overlap of 13 (Table 3, Figure 2).

180 The IHG-M provided GATK- and DRAGEN-based BRIDGES 306 BC PRS genotyping data of 593 samples. Locus  
181 rs138179519 did not meet the quality criteria, and additionally rs774021038 using DRAGEN. Of the remaining  
182 304 loci, 252 (82.89%) showed identical AFs (Supplementary Table 2). Using a threshold of 0.046  
183 (Supplementary Figure 4), resulted in 22 loci showing deviating AFs in GATK data, respectively 16 loci in DRAGEN  
184 data, with an overlap of 11 loci.

185 For the CFBOC data based on 416 samples, a threshold of 0.046 was calculated (Supplementary Figure 5). The  
186 loci of the BRIDGES 306 BC PRS were considered, 243 (79.41%) of which showed identical AFs for both callers  
187 applied (Supplementary Table 2). Overall 23 loci (all of which are included also in the BCAC 313 BC PRS)  
188 showed deviating AFs: 16 loci in GATK and 17 loci in freebayes data, with an overlap of 10 loci.

189 The IHG-R provided GATK- and CLC-based BRIDGES 306 BC PRS genotyping data of 251 samples  
190 (Supplementary Methods). Four loci did not meet the quality criteria in both settings, and additional four  
191 in the CLC setting. Of the remaining 298 loci, 228 (76.51%) showed identical AFs (Supplementary Table 2).  
192 Using a threshold of 0.063 (Supplementary Figure 6), resulted in 23 loci showing noticeably deviating AFs in GATK

193 data, respectively 19 loci in CLC data, with an overlap of 10 loci.

194 In summary, for five loci, deviating AFs were reported in all GC-HBOC real-world settings examined, namely  
195 for rs56097627, rs113778879, rs57589542, rs3988353, and rs3057314. Further three loci, namely  
196 rs574103382, rs73754909, and rs57920543, were reported with deviating AFs in all settings except for one  
197 (Table 3).

198 However, there were also 13 loci that were conspicuous in a single setting exclusively, namely four in IHG-R  
199 GATK data (rs1511243, rs4880038, rs1027113, rs1111207), three in IHG-R CLC-data (rs10975870, rs11049431,  
200 rs144767203), two each in ICG freebayes data (rs147399132, rs199504893) and IHG-M GATK data  
201 (rs143384623, rs66987842), and one each in IMGAG DRAGEN (rs9931038) and IMGAG freebayes data  
202 (rs12406858). Another 6 loci (rs34207738, rs10074269, rs55941023, rs851984, rs9421410, rs35054928) showed  
203 AF deviations in only one center, but these were concordant.

204 Considering the loci non-existent in gnomAD v3.1.2, rs113778879 was not observed with expected AF in any GC-  
205 HBOC center, and rs73754909 only with forced DRAGEN calling in IHG-M data. For rs79461387, expected AFs  
206 were reported when using freebayes or forced DRAGEN calling only. Of note, rs572022984 with zero allele count  
207 in gnomAD v3.1.2 NFEs and an expected AF of 0.0364 in CanRisk, was consistently not observed at all or with a  
208 maximum AF of 0.005 (Supplementary Table 2).

209 Five loci showing aberrant AFs in gnomAD v3.1.2 NFEs (Table 2) were not reported with deviating AF by any of  
210 the participating GC-HBOC centers, namely rs78425380, rs62331150, rs60954078, rs10862899, and rs112855987.

211

## 212 **Implications on risk prediction**

213 Without further information and assuming a standardized PRS at the 50th percentile, the estimated 10 year  
214 risks of developing primary BC of cancer-unaffected women of 20, 40, and 60 years of age were 0.1%, 1.5%,  
215 and 3.4% according to CanRisk (Supplementary Table 3). Percentiles of PRSs from artificial VCF files with  
216 aberrant dosages (see Methods) ranged from 47.5% (IHG-R CLC, BRIDGES 306) up to 55.3% (ICG freebayes,  
217 BCAC 313). The risk of 0.1% for a 20 year old woman was concordantly unchanged in all scenarios including

218 artificial PRSs. For a 40 year old woman, estimated 10 year risks were increased by 0.1% in seven scenarios,  
219 and for a 60 year old woman by up to 0.2% in nine scenarios.

220 Estimated remaining lifetime risks of developing primary BC assuming an average PRS (50th percentile) of  
221 cancer-unaffected women aged 20, 40, and 60 years are 11.3%, 10.9%, and 7.1% according to CanRisk  
222 (Supplementary Table 3). When using PRSs from artificial VCF files with aberrant dosages, estimated lifetime  
223 risks ranged from 11.1% up to 11.9% for a 20 year old woman, from 10.6% up to 11.4% for a 40 year old  
224 woman, and from 7.0% up to 7.4% for a 60 year old woman, whereby the lowest estimates were obtained  
225 with the BRIDGES 306 BC PRS based on IHG-R CLC data with 19 artificial dosages imputed, and the highest  
226 with the BCAC 313 BC PRS based on ICG freebayes data with also 19 artificial dosages imputed.

227

#### 228 **Consideration of alternative alleles and loci in linkage disequilibrium**

229 For 20 PRS loci showing noticeably deviating AFs in at least one real-world NGS data set, alternative alleles or  
230 overlapping variants with minimum AF 0.01 in NFEs were reported in gnomAD v3.1.2 (Supplementary Table  
231 4). For rs73754909 and rs79461387, both SNVs and non-existent in gnomAD v3.1.2, deletions were reported  
232 with comparable AFs to the ones expected by CanRisk. For both deletions, the adjacent downstream  
233 nucleotide of the reference sequence was identical to the substituted nucleotide of the expected effect allele  
234 (Figure 3). For rs113778879, which is also an SNV not contained in gnomAD v3.1.2, a similar observation  
235 could be made (Supplementary Figure 7), but the reported AF exceeds the expected one by more than 0.1  
236 (0.5762 versus 0.6818).

237 For 29 out of the 50 loci showing noticeable deviating AFs in at least one real-world data set, proxys in 1000G  
238 GRCh37 microarray data, 1000G GRCh38 High Coverage WGS data, or TOPMED European data could be  
239 identified (Supplementary Table 5). For rs73754909, rs79461387, and rs113778879, LDpair based on GRCh38  
240 reported the same alternative alleles as gnomAD v3.1.2 (Supplementary Table 4), where the original PRS loci  
241 are non-existent.

242 Proxys and alternative alleles showing AFs in gnomAD v3.1.2 comparable to expected CanRisk AFs, i.e., an

243 absolute deviation  $<0.016$ , were considered as possible workarounds for improved PRS genotyping, and  
244 further evaluated with respect to observed AFs in IMGAG freebayes data (Table 4). For 20 of these 22 PRS loci,  
245 absolute differences between expected and observed AFs in IMGAG freebayes data remained below the  
246 previously defined IMGAG freebayes-specific threshold of 0.036. The exceptions were the substitutions of  
247 rs12406858 and rs79461387. The latter is noteworthy because the original PRS locus, which is an SNV, is  
248 correctly called by freebayes in forced and unforced mode (Table 3), whereas GATK HaplotypeCaller seems to  
249 call an overlapping deletion of sequence GAG. Also noteworthy are the potential replacements of rs73754909  
250 and rs111833376, as both variants are consistently called with noticeably deviating AFs in real-world data  
251 sets.

252

## 253 **Discussion**

254 This study describes the systematic evaluation of NGS-based PRS genotyping in real-world data sets of five GC-  
255 HBOC centers. The observed AFs of PRS loci in individuals with European descent were employed as quality  
256 criterion, as the reproducibility of expected AFs of the PRS loci, and hence, the assumptions made about the  
257 overall PRS distribution, are an essential prerequisite for a correct risk calculation. In each setting under  
258 consideration, at least 14 out of 313 BCAC BC PRS loci, respectively 306 BRIDGES BC PRS loci, showed  
259 noticeably deviating AFs. These deviations were dependent on sequencing technology, variant caller and calling  
260 mode and can be expected to affect final BC risk calculations of the BOADICEA model implemented in CanRisk.  
261 Therefore, this study demonstrates the necessity to apply quality assurance not only in terms of sequencing  
262 coverage but also in terms of observed AFs in a sufficiently large cohort, when implementing PRSs in a routine  
263 diagnostic setting.

264 The presented results also point to potential solutions for improving genotyping performance with respect to  
265 the achievement of expected AFs for several loci, these primarily include the use of alternative variant callers  
266 or consideration of proxy variants. The use of certain variant callers resulted consistently in noticeable  
267 deviating AFs, which were not observed for other callers. This concerned e.g. rs62485509 when using

268 DRAGEN, and rs11268668 when using freebayes (Table 3). In each setting under investigation considering  
269 identical samples, the number of loci whose AFs match the expected AFs could be increased by variant-  
270 specific selection of the variant caller.

271 Comparison to large-scale population-specific data, such as gnomAD and 1000G High Coverage WGS,  
272 indicates that several PRS loci do not appear or appear with different alleles in NGS than in array-based  
273 genotyping. Here, four loci have been identified for which the use of alternative alleles could lead to the  
274 achievement of the intended, originally array-based determined AF, if NGS-based genotyping does not do so  
275 (Table 4). Two of these loci were absent in gnomAD v3.1.2 NFEs, which was also true for rs113778879 and  
276 rs572022984. As potential workaround for rs113778879, which is an SNV, an overlapping 5bp deletion was  
277 identified, but the observed AF exceeds the expected one by more than 0.1 (Supplementary Table 4).  
278 gnomAD SV v2.1 [23] reports a 1,370bp deletion starting at the same genomic position as rs572022984,  
279 namely DEL\_2\_27095, with an AF of 0.0417 in Europeans. However, genotyping of structural variants requires  
280 adapted variant calling approaches and therefore might be unfeasible within the scope of PRS genotyping in a  
281 routine diagnostic setting.

282 If no workarounds are available for loci showing noticeably deviating AFs, only imputation of the expected  
283 dosage according to CanRisk remains. This leads to smaller errors than omitting the locus from PRS  
284 calculation or setting the genotype to 0/0. However, each imputation causes a shift towards the mean PRS,  
285 and therefore imputations are meaningful only up to a certain extent.

286 PRSs for calculating individual BC risks will continue to evolve. For example, currently the Confluence Project<sup>2</sup>  
287 aims to develop multi-ancestry PRSs. In addition, PRSs become also more and more relevant for diagnostics of  
288 other diseases with a genetic component [24,25]. The presented results underline that it would facilitate the  
289 implementation in clinical routine and thus also increase the reliability of genetic diagnostics if the design of  
290 future PRSs would be guided by the reproducibility of the expected AFs in addition to the observed effect  
291 sizes. A straightforward strategy to achieve this could be to ensure comparability of AFs in large-scale

---

<sup>2</sup> <https://confluence.cancer.gov>

292 population databases, favorably based on different genotyping approaches, prior to including a locus in a PRS.  
293 This study has limitations. Larger sample sizes may have resulted in more accurate estimators of AFs.  
294 Furthermore, there was a strong enrichment for samples derived from individuals with familial BC/OC, which  
295 may have resulted in deviating AFs due to genetic load rather than technical artifacts. The genetic background  
296 could explain, e.g., the aberrant (but concordant) AFs of rs851984 in ICG data and of rs35054928 in CFBOC  
297 data. Finally, no statement can be made about whether the described AF deviations would persist when using  
298 arrays for genotyping, since corresponding analyses are not (yet) performed in any of the GC-HBOC centers.

299

### 300 **Data availability**

301 All data generated or analyzed during this study are included in this published article [and its supplementary  
302 files].

303

### 304 **References**

- 305 1. Lakeman IM, Hilbers FS, Rodriguez-Girondo M, A. Lee A, Vreeswijk MP, Hollestelle A, Seynaeve C,  
306 Meijers-Heijboer H, Oosterwijk JC, Hoogerbrugge N, et al. Addition of a 161-SNP polygenic risk score  
307 to family history-based risk prediction: impact on clinical management in non-*BRCA1/2* breast cancer  
308 families. *J Med Genet.* 2019; 56:581–589.
- 309 2. Mavaddat N, Michailidou K, Dennis J, Lush M, Fachal L, Lee A, Tyrer JP, Chen TH, Wang Q, Bolla MK, et  
310 al. Polygenic risk scores for prediction of breast cancer and breast cancer subtypes. *Am J Hum Genet.*  
311 2019; 104:21–34.
- 312 3. Shieh Y, Hu D, Ma L, Huntsman S, Gard CC, Leung JW, Tice JA, Vachon CM, Cummings SR, Kerlikowske  
313 K, et al. Breast cancer risk prediction using a clinical risk model and polygenic risk score. *Breast Cancer*  
314 *Res Treat.* 2016; 159:513–525.
- 315 4. Borde J, Ernst C, Wappenschmidt B, Niederacher D, Weber-Lassalle K, Schmidt G, Hauke J, Quante AS,

- 316 Weber-Lassalle N, Horváth J, et al. Performance of breast cancer polygenic risk scores in 760 female  
317 *CHEK2* germline mutation carriers. *J Natl Cancer Inst.* 2021; 113:893–899.
- 318 5. Borde J, Laitman Y, Blümcke B, Niederacher D, Weber-Lassalle K, Sutter C, Rump A, Arnold N, Wang-  
319 Gohrke S, Horváth J, et al. Polygenic risk scores indicate extreme ages at onset of breast cancer in  
320 female *BRCA1/2* pathogenic variant carriers. *BMC Cancer.* 2022; 22:1–9.
- 321 6. Gallagher S, Hughes E, Wagner S, Tshiaba P, Rosenthal E, Roa BB, Kurian AW, Domchek SM, Garber J,  
322 Lancaster J, et al. Association of a polygenic risk score with breast cancer among women carriers of  
323 high-and moderate-risk breast cancer genes. *JAMA Netw Open.* 2020; 3:e208501–e208501.
- 324 7. Kuchenbaecker KB, McGuffog L, Barrowdale L, Lee A, Soucy P, Healey S, Dennis J, Lush M, Robson  
325 M, Spurdle AB, et al. Evaluation of polygenic risk scores for breast and ovarian cancer risk prediction  
326 in *BRCA1* and *BRCA2* mutation carriers. *J Natl Cancer Inst.* 2017; 109:djw302.
- 327 8. Stiller S, Drukewitz S, Lehmann K, Hentschel J, Strehlow V. Clinical impact of polygenic risk score for  
328 breast cancer risk prediction in 382 individuals with hereditary breast and ovarian cancer syndrome.  
329 *Cancers (Basel).* 2023; 15:3938.
- 330 9. Carver T, Hartley S, Lee A, Cunningham AP, Archer S, Babb de Villiers C, Roberts J, Ruston R, Walter  
331 FM, Tischkowitz M, et al. CanRisk tool – a web interface for the prediction of breast and ovarian cancer  
332 risk and the likelihood of carrying genetic pathogenic variants. *Cancer Epidemiol Biomarkers Prev.*  
333 2021; 30:469–473.
- 334 10. Lee A, Mavaddat N, Wilcox AN, Cunningham AP, Carver T, Hartley S, Babb de Villiers C, Izquierdo A,  
335 Simard J, Schmidt MK, et al. BOADICEA: a comprehensive breast cancer risk prediction model  
336 incorporating genetic and nongenetic risk factors. *Genet Med.* 2019; 21:1708–1718.
- 337 11. Carver T. Canrisk knowledgebase. [https://canrisk.atlassian.net/wiki/spaces/FAQS/  
338 pages/35979266/What+variants+are+used+in+the+PRS](https://canrisk.atlassian.net/wiki/spaces/FAQS/pages/35979266/What+variants+are+used+in+the+PRS), 2022. Accessed: 2022-11-30.
- 339 12. Mavaddat N, Ficoella L, Carver T, Lee A, Cunningham AP, Lush M, Dennis J, Tischkowitz M, Downes K,  
340 Hu D, et al. Incorporating Alternative Polygenic Risk Scores into the BOADICEA Breast Cancer Risk

- 341 Prediction Model. *Cancer Epidemiol Biomarkers*. 2023; 32:422–427.
- 342 13. Kiialainen A, Karlberg O, Ahlford A, Sigurdsson S, Lindblad-Toh K, Syvänen AC. Performance of  
343 microarray and liquid based capture methods for target enrichment for massively parallel sequencing and  
344 SNP discovery. *PLoS One*. 2011; 6:e16486.
- 345 14. Sulonen AM, Ellonen P, Almusa H, Lepistö M, Eldfors S, Hannula S, Miettinen T, Tynismaa H, Salo  
346 P, Heckman C, et al. Comparison of solution-based exome capture methods for next generation  
347 sequencing. *Genome Biol*. 2011; 12:1–18.
- 348 15. Teer JK, Bonnycastle LL, Chines PS, Hansen NF, Aoyama N, Swift AJ, Abaan HO, Albert TJ, Margulies  
349 EH, Green ED, et al. Systematic comparison of three genomic enrichment methods for massively  
350 parallel DNA sequencing. *Genome Res*. 2010; 20:1420– 1431.
- 351 16. Yi M, Zhao Y, Jia L, He M, Kebebew E, Stephens RM. Performance comparison of SNP detection tools  
352 with illumina exome sequencing data – an assessment using both family pedigree information and  
353 sample-matched SNP array data. *Nucleic Acids Res*. 2014; 42:e101– e101.
- 354 17. Li H. Toward better understanding of artifacts in variant calling from high-coverage samples.  
355 *Bioinformatics*. 2014; 30:2843–2851.
- 356 18. Reis AL, Deveson IW, Madala BS, Wong T, Barker C, Xu J, Lennon N, Tong W, Mercer TR. Using  
357 synthetic chromosome controls to evaluate the sequencing of difficult regions within the human  
358 genome. *Genome Biol*. 2022; 23:1–24.
- 359 19. Stoler N, Nekrutenko A. Sequencing error profiles of illumina sequencing instruments. *NAR Genom  
360 Bioinform*. 2021; 3:lqab019.
- 361 20. Gudmundsson S, Singer-Berk M, Watts NA, Phu W, Goodrich JK, Solomonson M, Genome  
362 Aggregation Database Consortium, Rehm HL, MacArthur DG, O’Donnell-Luria A. Variant interpretation  
363 using population databases: Lessons from gnomAD. *Hum Mutat*. 2022; 43:1012–1030.
- 364 21. Karczewski KJ, Francioli LC, Tiao G, Cummings BB, Alföldi J, Wang Q, Collins RL, Laricchia KM, Ganna  
365 A, Birnbaum DP, et al. The mutational constraint spectrum quantified from variation in 141,456



- 366 humans. *Nature*. 2020; 581:434–443.
- 367 22. Sherry ST, Ward MH, Kholodov M, Baker J, Phan L, Smigielski EM, Sirotkin K. dbSNP: the NCBI  
368 database of genetic variation. *Nucleic Acids Res*. 2001; 29:308–311.
- 369 23. Collins RL, Brand H, Karczewski KJ, Zhao X, Alföldi J, Francioli LC, Khera AV, Lowther C, Gauthier LD,  
370 Wang H, et al. A structural variation reference for medical and population genetics. *Nature*. 2020;  
371 581:444–451.
- 372 24. Adeyemo A, Balaconis MK, Darnes DR, Fatumo S, Moreno PG, Hodonsky CJ, Inouye M, Kanai M,  
373 Kato K, Knoppers BM, et al. Responsible use of polygenic risk scores in the clinic: potential benefits,  
374 risks and gaps. *Nat Med*. 2021; 27:1876–1884.
- 375 25. Sugrue LP, Desikan RS. What are polygenic scores and why are they important? *JAMA*. 2019;  
376 321:1820–1821.

377

378 **Acknowledgements.** We thank the coordinator of the GC-HBOC, Rita K. Schmutzler, and all GC-HBOC  
379 center directors for their support of the GC-HBOC Bioinformatics Working Group. Further, we thank Joe Dennis  
380 for helpful comments.

381

382 **The Bioinformatics Working Group of the German Consortium for Hereditary Breast & Ovarian Cancer.**

383 Norbert Arnold<sup>13</sup>, Alexandra Baumann<sup>14</sup>, Marvin Döbel<sup>15</sup>, Stephan Drukewitz<sup>16</sup>, Christoph Engel<sup>17</sup>, Corinna  
384 Ernst<sup>18</sup>, Rudel Christian Nkouamedjo Fankep<sup>18</sup>, Michael Forster<sup>13</sup>, Peter Frommolt<sup>19</sup>, Eva Groß<sup>20</sup>, Karl  
385 Hackmann<sup>14</sup>, Johannes Helmuth<sup>21</sup>, Ellen Honisch<sup>22</sup>, Tim Hutschenreiter<sup>14</sup>, Anna-Lena Katzke<sup>23</sup>, Anna-  
386 Lena Kobiela<sup>18</sup>, Zarah Kowalzyk<sup>14</sup>, Oliver Kutz<sup>14</sup>, Christoph Meier<sup>24,25</sup>, Maximilian Radtke<sup>16</sup>, Juliane  
387 Ramser<sup>26</sup>, Robert Remy<sup>18</sup>, Julia Ritter<sup>21</sup>, Christian Ruckert<sup>27</sup>, Gunnar Schmidt<sup>23</sup>, Benedikt Schnur<sup>23</sup>, Dariush  
388 Skowronek<sup>28</sup>, Marc Sturm<sup>15</sup>, Katharina Thiedig<sup>26</sup>, Steffen Uebe<sup>29</sup>, Shan Wang-Gohrke<sup>30</sup>, Andreas Zimmer<sup>31</sup>

389 <sup>13</sup>Department of Gynecology and Obstetrics, Institute of Clinical Chemistry Institute of Clinical Molecular  
390 Biology, University Hospital Schleswig-Holstein, Campus Kiel, Kiel, Germany. <sup>14</sup>Institute for Clinical Genetics,

391 University Hospital Carl Gustav Carus at TU Dresden, Dresden, Germany; ERN GENTURIS, Hereditary  
392 Cancer Syndrome Center Dresden, Germany; National Center for Tumor Diseases Dresden (NCT/UCC),  
393 Germany; German Cancer Research Center (DKFZ), Heidelberg, Germany; Faculty of Medicine and  
394 University Hospital Carl Gustav Carus at TU Dresden, Dresden, Germany; German Cancer Consortium  
395 (DKTK), Dresden, Germany; German Cancer Research Center (DKFZ), Heidelberg, Germany; Max Planck  
396 Institute of Molecular Cell Biology and Genetics, Dresden, Germany.<sup>15</sup>Institute of Medical Genetics and  
397 Applied Genomics, University Hospital Tübingen, Tübingen, Germany.<sup>16</sup>Institute of Human Genetics,  
398 University of Leipzig Medical Center, Leipzig, Germany.<sup>17</sup>Institute for Medical Informatics, Statistics and  
399 Epidemiology, University of Leipzig, Leipzig, Germany.<sup>18</sup>Center for Familial Breast and Ovarian Cancer,  
400 Center for Integrated Oncology (CIO), Medical Faculty, University of Cologne and University Hospital  
401 Cologne, Cologne, Germany.<sup>19</sup>Institute for Human Genetics, University Hospital Hamburg-Eppendorf,  
402 Hamburg, Germany.<sup>20</sup>Department of Obstetrics and Gynecology, Ludwig-Maximilians-University of Munich,  
403 Munich, Germany.<sup>21</sup>Department of Human Genetics, Labor Berlin – Charité Vivantes GmbH, Berlin,  
404 Germany.<sup>22</sup>Department of Gynaecology and Obstetrics, University Hospital Düsseldorf, Heinrich-Heine  
405 University Düsseldorf, Düsseldorf, Germany.<sup>23</sup>Department of Human Genetics, Hannover Medical School  
406 (MHH), Hannover, Germany.<sup>24</sup>Institute of Human Genetics, University of Regensburg, Regensburg,  
407 Germany.<sup>25</sup>Institute of Clinical Human Genetics, University Hospital Regensburg, Regensburg, Germany.  
408 <sup>26</sup>Division of Gynaecology and Obstetrics, Klinikum rechts der Isar der Technischen Universität München,  
409 München, Germany.<sup>27</sup>Institute of Human Genetics, University of Münster, Münster, Germany.<sup>28</sup>Department  
410 of Human Genetics, University Medicine Greifswald and Interfaculty Institute of Genetics and Functional  
411 Genomics, University of Greifswald, Greifswald, Germany.<sup>29</sup>Institute of Human Genetics,  
412 Universitätsklinikum Erlangen, Friedrich-Alexander-Universität, Erlangen-Nürnberg, Germany.  
413 <sup>30</sup>Department of Gynaecology and Obstetrics, University Hospital Ulm, Ulm, Germany.<sup>31</sup>Institute for Human  
414 Genetics, Medical Center University of Freiburg, Faculty of Medicine, University of Freiburg, Freiburg,  
415 Germany.

416

417 **Author contributions.** Conceptualization: GS, MS and CE. Methodology: All authors. Data analysis: AB,  
418 CR, CM, RR, MS and CE. Editing and review of manuscript: All authors. Final manuscript review: All  
419 authors.

420

421 **Funding.** RR and RF received funding from the German Federal Ministry of Health within the genomDE  
422 initiative. MD received funding from the German Cancer Aid (<https://www.krebshilfe.de/>) in the HerediVar  
423 project.

424

425 **Competing interests.** The authors declare no competing interest.

426

427 **Ethical approval.** IMGAG: The use of aggregate statistics of human subject genetics data was approved  
428 by the ethics committee of the Medical Faculty of the University of Tübingen, Germany (Genome+,  
429 ClinicalTrial.gov-Nr: NCT04315727; #066/2021BO2 for retrospective data analysis). ICG, IHG-M, CFBOC, IHG-  
430 R: Written informed consent was obtained from all patients and ethical approval was granted by the ethics  
431 committee of the Technische Universität Dresden, ethics committee of the Medical Association Westfalen-  
432 Lippe, ethics committee of the Medical Faculty of the University of Cologne (19-1360\_4), the ethics  
433 committee of the University of Regensburg (21-2192-103).

434

435 **Figure legends**

436 Figure 1: Comparison of variant effect allele frequencies (AFs) specified by CanRisk and observed in gnomAD  
437 v3.1.2 non-Finnish European samples for 320 variants incorporated in BCAC 313 or BRIDGES 306 breast  
438 cancer polygenic risk scores. Extremely deviating AFs with absolute difference  $> 0.016$  are indicated by red  
439 markers.

440

441 Figure 2: Comparison of effect allele frequencies (AFs) specified by CanRisk and observed in 10 real-world  
442 data sets for 320 loci incorporated in BCAC 313 or BRIDGES 306 breast cancer polygenic risk scores. Data was  
443 provided by the Institute of Medical Genetics and Applied Genomics (IMGAG) at University Hospital Tübingen,  
444 Institute for Clinical Genetics (ICG) at University Hospital Carl Gustav Carus Dresden, by the Institute of  
445 Human Genetics at the University of Münster (IHG-M), by the Center for Familial Breast and Ovarian Cancer  
446 (CFBOC) at University Hospital Cologne, and by the Institute of Human Genetics at the University of  
447 Regensburg (IHG-R).

448

449 Figure 3: Sequences of reference, expected effect allele and potential alternative allele of polygenic risk score  
450 loci rs73754909 and rs79461387 (hg19-based). Both alternative alleles are deletions with the adjacent  
451 downstream nucleotide identical to the expected substituted one.

452

## 453 **Table legends**

454 Table 1: Characteristics of data sets provided by participating centers of the German Consortium for  
455 Hereditary Breast & Ovarian Cancer (GC-HBOC), namely the Institute of Medical Genetics and Applied  
456 Genomics (IMGAG), University Hospital Tübingen, the Institute for Clinical Genetics (ICG), University Hospital  
457 Carl Gustav Carus Dresden, the Institute of Human Genetics at the University of Münster (IHG-M), the Center  
458 for Familial Breast and Ovarian Cancer (CFBOC), University Hospital Cologne, and the Institute of Human  
459 Genetics at the University of Regensburg (IHG-R). Each center provided two data sets. BC/OC: Breast/ovarian  
460 cancer; DP: Sequencing depth; PRS: Polygenic risk score.

461  
462 Table 2: Characteristics of loci incorporated in the BCAC 313 or BRIDGES 306 breast cancer PRSs that were  
463 either not included in the gnomAD v3.1.2 database or reported with extremely deviating allele frequency  
464 compared to CanRisk. Log odds ratios (ORs) are identical for BCAC 313 and BRIDGES 306, but missing values  
465 indicate loci not included in the corresponding PRS. Entries in the Comment column refer to technical artifacts  
466 reported in gnomAD. LCR: low complexity region; LQS: low-quality site (in <50% of samples covered); VQSR:  
467 failed allele-specific GATK Variant Quality Score Recalibration (VQSR) filter.

468  
469 Table 3: Summary of polygenic risk score genotyping results with noticeably deviating allele frequencies (AFs)  
470 of centers of the German Consortium for Hereditary Breast and Ovarian Cancer. Noticeably deviating AFs are  
471 shown in bold. Loci (hg19-based) of rs11268668 and rs57589542 are 1-204502514-T-TTCTGAAACAGGG (hg19)  
472 and 6-152022664-CAAAAAAAAA-C (hg19), respectively. WGS: Whole-genome sequencing. MGP: Multi-gene  
473 panel sequencing. FB: freebayes.

474  
475 Table 4: Potential solutions for improving polygenic risk score (PRS) genotyping performance with respect to  
476 the achievement of allele frequencies (AFs) expected by CanRisk, using alternative alleles or proxys. Resulting  
477 AFs were investigated based on gnomAD v3.1.2 non-Finnish European data and genotyping results of 1410

- 478 European whole-genome sequencing (WGS) samples using (unforced) freebayes, provided by the Institute of  
479 Medical Genetics and Applied Genomics (IMGAG) at University Hospital Tübingen.

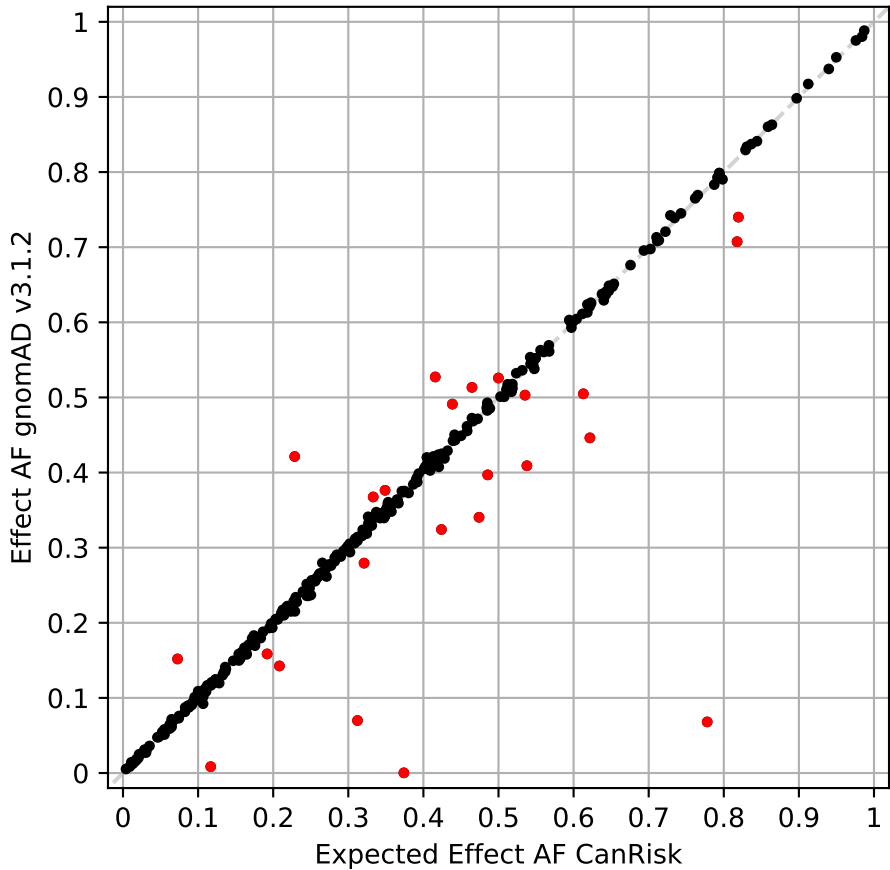

IMGAG DRAGEN (WGS, N=348)

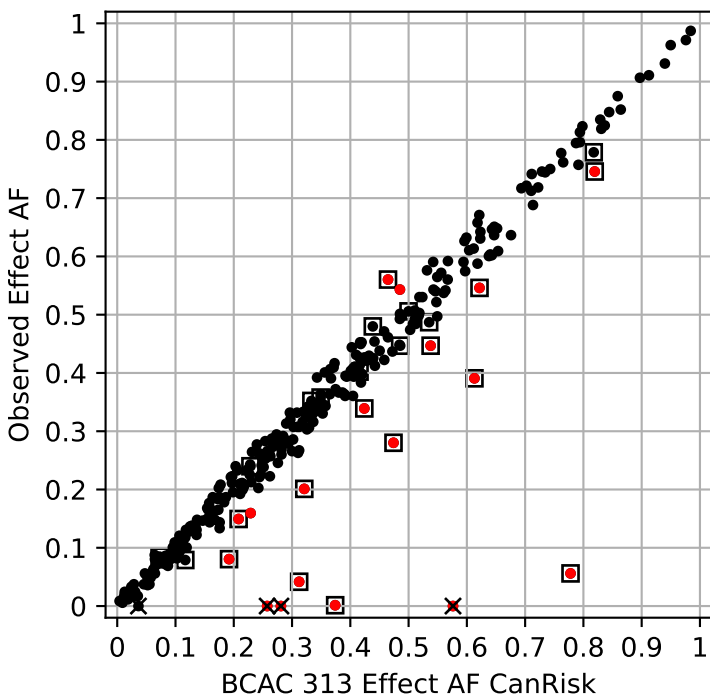

ICG GATK (Twist Panel, N=595)

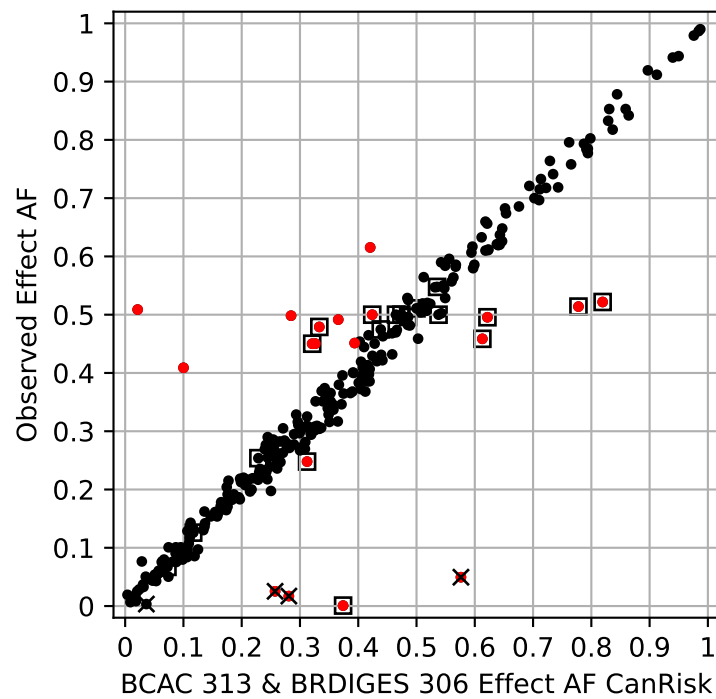

IHG-M GATK (Twist Panel, N=593)

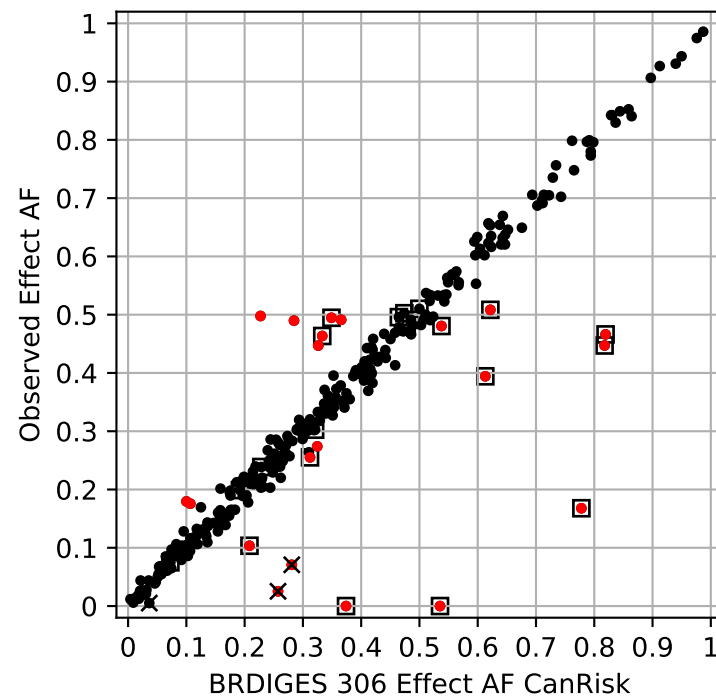

IMGAG freebayes (WGS, N=1410)

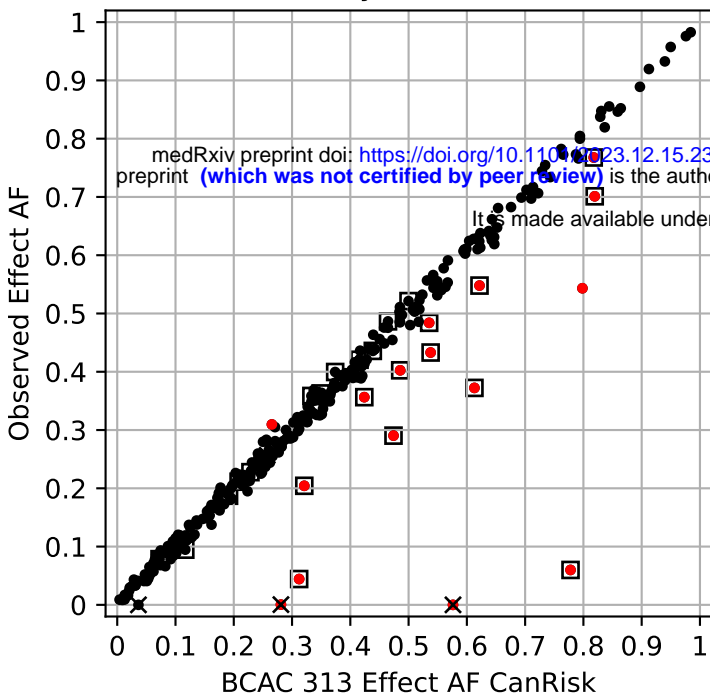

ICG freebayes (Twist Panel, N=595)

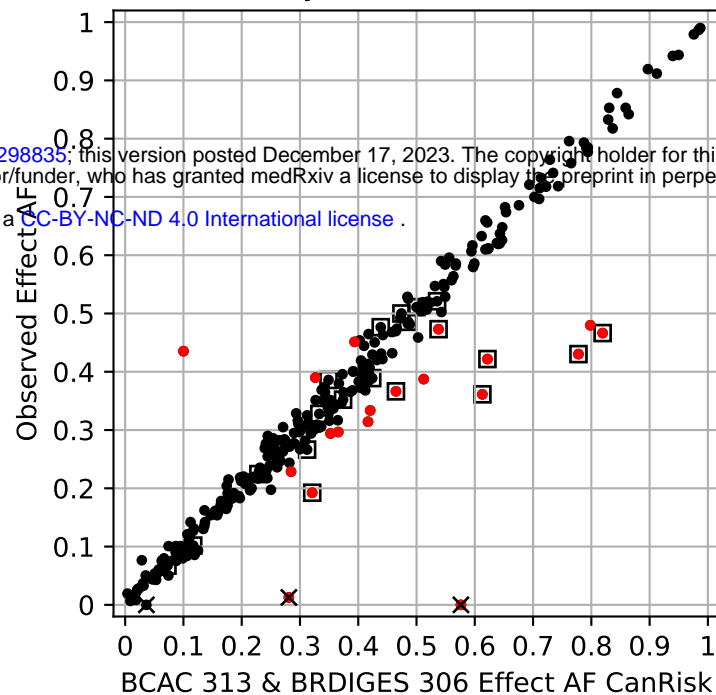

IHG-M DRAGEN (Twist Panel, N=593)

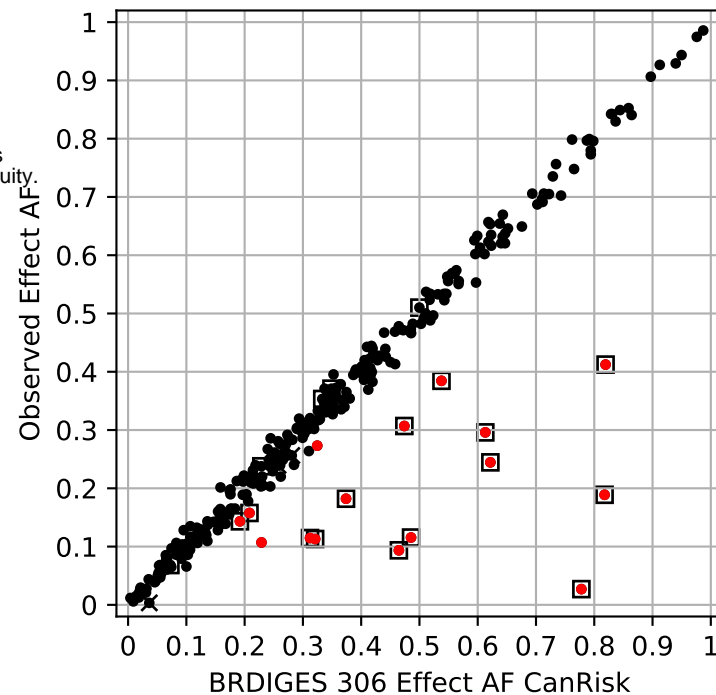

CFBOC GATK (TruRisk Panel, N=416)

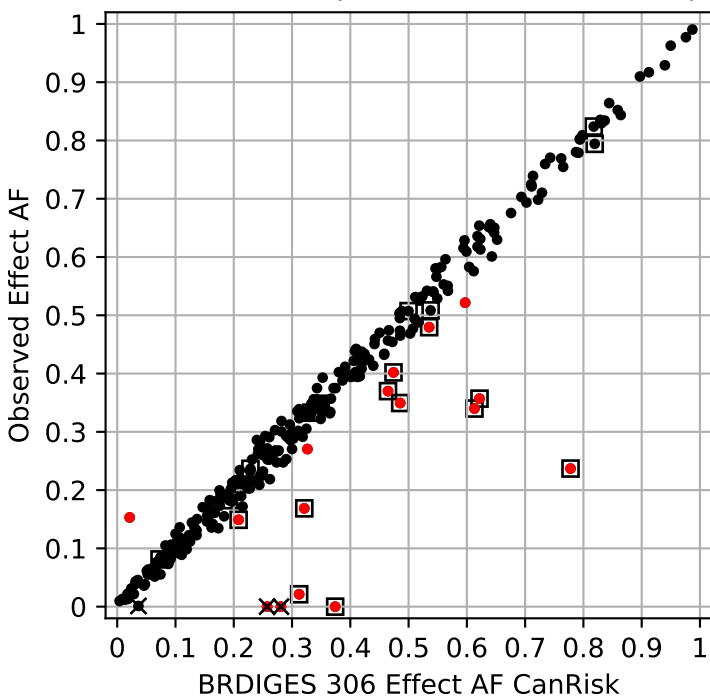

IHG-R GATK (TruRisk Panel, N=251)

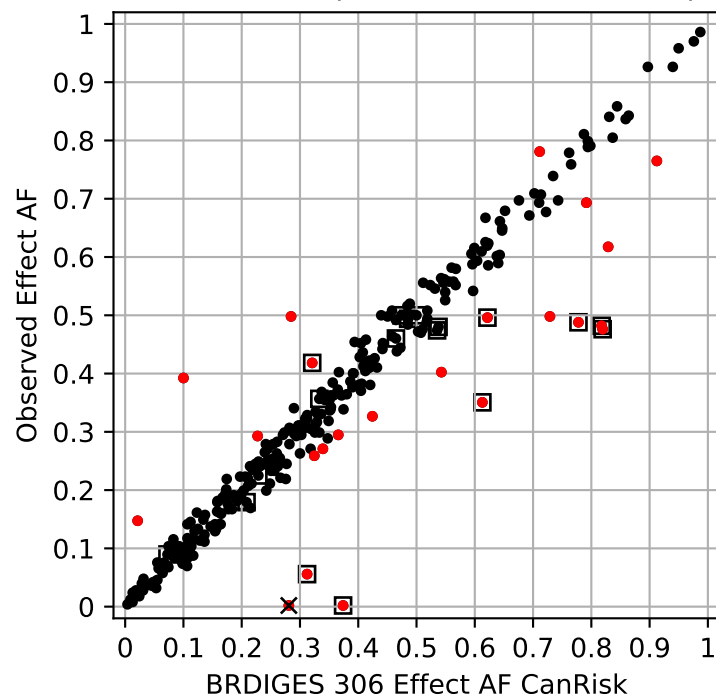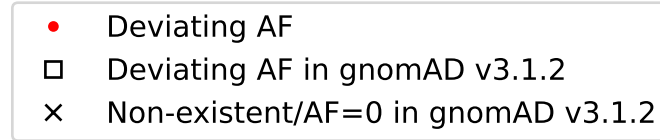

CFBOC freebayes (TruRisk Panel, N=416)

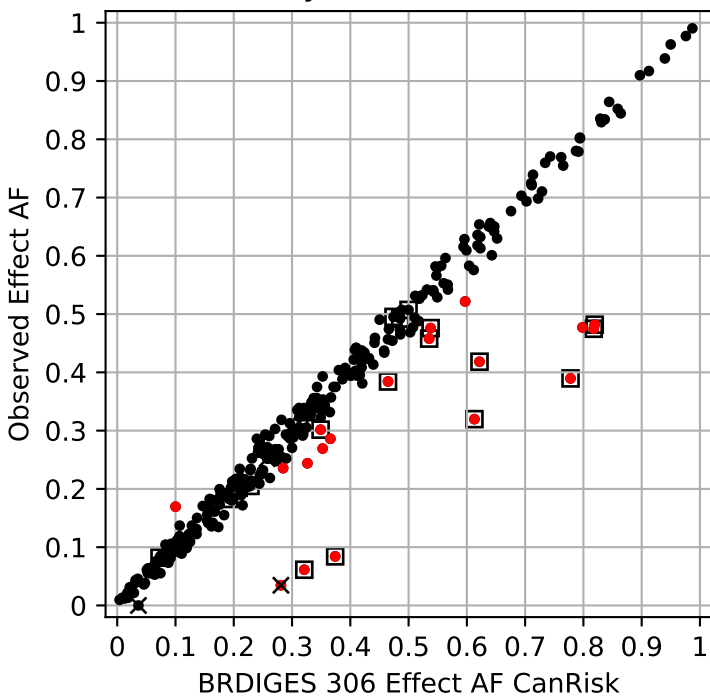

IHG-R CLC (TruRisk Panel, N=251)

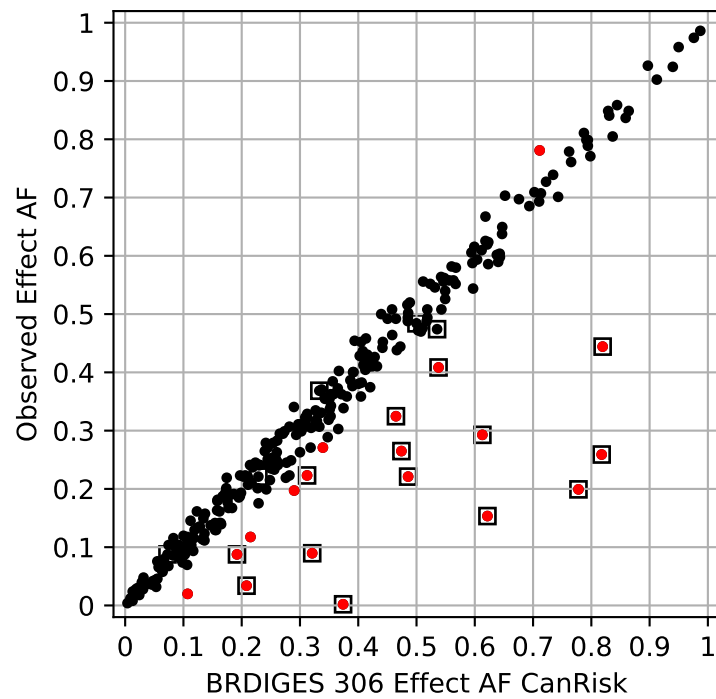

medRxiv preprint doi: <https://doi.org/10.1101/2023.12.15.23298835>; this version posted December 17, 2023. The copyright holder for this preprint (which was not certified by peer review) is the author/funder, who has granted medRxiv a license to display the preprint in perpetuity. It is made available under a [CC-BY-NC-ND 4.0 International license](https://creativecommons.org/licenses/by-nc-nd/4.0/).



**rs73754909 (hg19: 6-87803819-T-C)**

chr6 | 87,803,790 | 87,803,800 | 87,803,810 | 87,803,820 | 87,803,830  
Reference . . . **ATATTTTCAGAACTTTAAAAGATTCCTTTTCTAAAGCAAAA** . . .

chr6 | 87,803,790 | 87,803,800 | 87,803,810 | 87,803,820 | 87,803,830  
Expected . . . **ATATTTTCAGAACTTTAAAAGATTCCTTTTCTAAAGCAAAA** . . .

chr6 | 87,803,790 | 87,803,800 | 87,803,810 | 87,803,820 | 87,803,830  
Alternative  
rs779759288 . . . **ATATTTTC**-----**CTAAAGCAAAA** . . .

**rs79461387 (hg19: 17-29168077-G-T)**

chr17 | 29,168,060 | 29,168,070 | 29,168,080 | 29,168,090 | 29,168,100  
Reference . . . **CTCTTGTTGCCCAGGCGAGAGTGCAATGGCTGGATCTCGGCT** . . .

chr17 | 29,168,060 | 29,168,070 | 29,168,080 | 29,168,090 | 29,168,100  
Expected . . . **CTCTTGTTGCCCAGGCGATAGTGCAATGGCTGGATCTCGGCT** . . .

chr17 | 29,168,060 | 29,168,070 | 29,168,080 | 29,168,090 | 29,168,100  
Alternative . . . **CTCTTGTTGCCCAGGCGA**---**TGCAATGGCTGGATCTCGGCT** . . .

|                    |       | IMGAG            | ICG                          | IHG-M                       | CFBOC                       | IHG-R                       |
|--------------------|-------|------------------|------------------------------|-----------------------------|-----------------------------|-----------------------------|
| Sample size        | Set 1 | 348              | 595                          | 593                         | 416                         | 251                         |
|                    | Set 2 | 1410             |                              |                             |                             |                             |
| Testing indication |       | various          | cancer-related               | familial BC/OC              | familial BC/OC              | familial BC/OC              |
| Considered PRS     |       | BCAC 313         | BCAC 313<br>BRIDGES 306      | BRIDGES 306                 | BRIDGES 306                 | BRIDGES 306                 |
| NGS approach       |       | WGS              | Twist Custom<br>Cancer Panel | Twist Custom<br>Panel       | Agilent<br>TruRisk v3       | Agilent<br>TruRisk v3       |
| Reference          |       | hg38             | hg19                         | hg19                        | hg19                        | hg38                        |
| Variant caller     | Set 1 | DRAGEN v4.0.3    | freebayes v1.3.6             | DRAGEN v4.2.4               | freebayes v1.3.6            | CLC LightSpeed v23.0.2      |
|                    | Set 2 | freebayes v1.3.6 | GATK v4.2.6 HaplotypeCaller  | GATK v4.4.0 HaplotypeCaller | GATK v4.3.2 HaplotypeCaller | GATK v4.2.6 HaplotypeCaller |
| Calling mode       | Set 1 | unforced         | forced                       | forced                      | forced                      | unforced                    |
|                    | Set 2 |                  |                              |                             |                             | forced                      |
| Quality filter     |       | DP ≥ 15          | DP ≥ 20                      | DP ≥ 20                     | DP ≥ 30                     | DP ≥ 10                     |

| rs ID       | Locus (hg19)          | BCAC | CanRisk |          |        | gnomAD v3.1.2        |          | Comment |
|-------------|-----------------------|------|---------|----------|--------|----------------------|----------|---------|
|             |                       |      | log OR  | BRIDGDES | AF     | AF                   |          |         |
| rs56168262  | 1-51467096-CT-C       |      | 0.0374  | 0.0374   | 0.4856 | 0.3969               | LCR      |         |
| rs56097627  | 1-110198129-CAAA-C    |      | 0.0458  | 0.0458   | 0.7779 | 0.0681               | LCR      |         |
| rs143384623 | 1-145604302-C-CT      |      | -0.0399 | -0.0399  | 0.3490 | 0.3764               | LCR      |         |
| rs78425380  | 2-10138983-T-C        |      | 0.0603  |          | 0.1168 | 0.0085               | LCR,LQS  |         |
| rs553796823 | 2-39699510-C-CT       |      | -0.0402 | -0.0402  | 0.4647 | 0.5134               | LCR      |         |
| rs572022984 | 2-217955896-GA-G      |      | -0.2016 | -0.2016  | 0.0364 | allele count zero    |          |         |
| rs774021038 | 4-84370124-TA-T       |      | -0.0464 | -0.0464  | 0.5353 | 0.5030               | LCR      |         |
| rs147404208 | 4-92594859-TTCTTTC-T  |      | -0.0407 |          | 0.4386 | 0.4911               | LCR      |         |
| rs62331150  | 4-106069013-G-T       |      | 0.0471  | 0.0471   | 0.2286 | 0.4214               | LQS      |         |
| rs113778879 | 5-58241712-C-T        |      | -0.0434 |          | 0.5762 | not listed in gnomAD |          |         |
| rs543824204 | 6-20537845-CA-C       |      | -0.0391 | -0.0391  | 0.4741 | 0.3405               | LCR      |         |
| rs574103382 | 6-82263549-AAT-A      |      | 0.0477  |          | 0.4240 | 0.3242               | LCR      |         |
| rs73754909  | 6-87803819-T-C        |      | 0.0383  | 0.0383   | 0.2809 | not listed in gnomAD |          |         |
| rs60954078  | 6-151955914-A-G       |      | 0.1449  | 0.1449   | 0.0726 | 0.1519               | LCR      |         |
| rs57589542  | 6-152022664-CAAAAAA-C |      | 0.0137  | 0.0137   | 0.6130 | 0.5048               | LCR      |         |
| rs10644978  | 7-91459189-A-ATT      |      | 0.0452  | 0.0452   | 0.3332 | 0.3675               | LCR      |         |
| rs111963714 | 7-99948655-T-G        |      | 0.0420  | 0.0420   | 0.2083 | 0.1425               |          |         |
| rs5887960   | 7-139943702-CT-C      |      | 0.0582  | 0.0582   | 0.5378 | 0.4091               | LCR      |         |
| rs3988353   | 8-17787610-CT-C       |      | -0.0377 | -0.0377  | 0.6217 | 0.4462               | LCR,VQSR |         |
| rs3057314   | 9-21964882-CAAAA-C    |      | 0.0550  | 0.0550   | 0.3210 | 0.2794               | LCR      |         |
| rs2384736   | 10-38523626-C-A       |      | 0.0404  | 0.0404   | 0.3740 | 0.0003               | LCR,LQS  |         |
| rs111833376 | 10-71335574-C-T       |      | -0.0404 | 0.3122   | 0.3122 | 0.0699               | LCR      |         |
| rs140936696 | 10-95292187-CAA-C     |      | -0.0512 | -0.0512  | 0.8177 | 0.7074               | LCR      |         |
| rs10862899  | 12-85004551-C-T       |      | 0.0348  | 0.0348   | 0.4999 | 0.5259               |          |         |
| rs57920543  | 16-4008542-CAAAAA-C   |      | -0.0329 | -0.0329  | 0.8194 | 0.7400               | LCR      |         |
| rs79461387  | 17-29168077-G-T       |      | -0.0568 | -0.0568  | 0.2573 | not listed in gnomAD |          |         |
| rs2668667   | 17-44283858-G-A       |      | -0.0540 | -0.0540  | 0.1919 | 0.1586               |          |         |
| rs112855987 | 22-45319953-G-A       |      | -0.0134 |          | 0.4158 | 0.5272               | LCR      |         |

| rs ID       | Locus (hg19)       | Allele Frequencies |         |          |               |               |               |               |               |               |               |               |               |               |           | gnomAD |
|-------------|--------------------|--------------------|---------|----------|---------------|---------------|---------------|---------------|---------------|---------------|---------------|---------------|---------------|---------------|-----------|--------|
|             |                    | log OR             |         | expected | IMGAG (WGS)   |               | ICG (MGP)     |               | IHG-M (MGP)   |               | CFBOC (MGP)   |               | IHG-R (MGP)   |               | deviating |        |
|             |                    | BCAC               | BRIDGES |          | DRAGEN        | FB            | GATK          | FB            | GATK          | DRAGEN        | GATK          | FB            | GATK          | CLC           | AF        |        |
| rs56168262  | 1-51467096-CT-C    | 0.0458             | 0.0458  | 0.4856   | 0.4468        | <b>0.4025</b> | 0.4961        | 0.4857        | 0.4911        | <b>0.1155</b> | <b>0.3494</b> | 0.4923        | 0.4940        | <b>0.2211</b> | yes       |        |
| rs56097627  | 1-110198129-CAAA-C | 0.0374             | 0.0374  | 0.7779   | <b>0.0560</b> | <b>0.0599</b> | <b>0.5139</b> | <b>0.4303</b> | <b>0.1679</b> | <b>0.0270</b> | <b>0.237</b>  | <b>0.3896</b> | <b>0.4880</b> | <b>0.1992</b> | yes       |        |
| rs12406858  | 1-118141492-A-C    | 0.0452             | 0.0452  | 0.2654   | 0.2874        | <b>0.3096</b> | 0.2824        | 0.2824        | 0.2487        | 0.2487        | 0.2656        | 0.2668        | 0.2550        | 0.2948        | no        |        |
| rs143384623 | 1-145604302-C-CT   | -0.0399            | -0.0399 | 0.3490   | 0.3578        | 0.3628        | -             | 0.3859        | <b>0.4947</b> | 0.3710        | 0.3482        | 0.3017        | -             | -             | yes       |        |
| rs11463354  | 1-172328767-T-TA   | -0.0435            | -0.0435 | 0.3264   | 0.3305        | 0.3142        | <b>0.4503</b> | <b>0.3899</b> | <b>0.4469</b> | 0.3187        | <b>0.2704</b> | <b>0.2440</b> | 0.3127        | 0.3167        | no        |        |
| rs11268668  | see caption        | -0.0321            | -0.0321 | 0.7983   | 0.8233        | <b>0.5433</b> | 0.8025        | <b>0.4798</b> | 0.7960        | 0.7960        | 0.8089        | <b>0.4772</b> | 0.7908        | 0.7709        | no        |        |
| rs553796823 | 2-39699510-C-CT    | -0.0420            | -0.0420 | 0.4647   | <b>0.5603</b> | 0.4865        | 0.5000        | <b>0.3664</b> | 0.4958        | <b>0.0936</b> | <b>0.3699</b> | <b>0.3843</b> | 0.4602        | <b>0.3247</b> | yes       |        |
| rs11693806  | 2-218292158-C-G    | -0.0757            | -0.0757 | 0.7289   | 0.7457        | 0.7443        | 0.7639        | 0.7639        | 0.7352        | 0.7352        | 0.7103        | 0.7103        | <b>0.4980</b> | -             | no        |        |
| rs371314787 | 3-49709912-C-CT    | -0.0367            | -0.0367 | 0.2847   | 0.2917        | 0.2809        | <b>0.4983</b> | <b>0.2286</b> | <b>0.4898</b> | 0.2403        | 0.2476        | 0.2356        | <b>0.4980</b> | 0.2490        | no        |        |
| rs34207738  | 3-141112859-CTT-C  | 0.0551             | 0.0551  | 0.4205   | 0.3980        | 0.3929        | <b>0.6154</b> | <b>0.3336</b> | 0.4585        | 0.4300        | 0.4246        | 0.3811        | 0.3805        | 0.3745        | no        |        |
| rs774021038 | 4-84370124-TA-T    | -0.0464            | -0.0464 | 0.5353   | 0.4871        | <b>0.4840</b> | 0.5477        | 0.5210        | <b>0.0000</b> | -             | <b>0.4796</b> | <b>0.4579</b> | 0.4741        | 0.4741        | yes       |        |
| rs147399132 | 4-126752992-A-AAT  | -0.0377            |         | 0.5123   | 0.4842        | 0.5092        | 0.5644        | <b>0.3874</b> |               |               |               |               |               |               | no        |        |
| rs199562199 | 5-52679539-C-CA    | 0.0571             | 0.0571  | 0.1001   | 0.1049        | 0.1142        | <b>0.4089</b> | <b>0.4353</b> | <b>0.1795</b> | 0.0658        | 0.1250        | <b>0.1695</b> | <b>0.3924</b> | 0.1195        | no        |        |
| rs113803968 | 5-55662540-C-CT    | -0.0458            | -0.0458 | 0.3657   | 0.4066        | 0.3603        | <b>0.4916</b> | <b>0.2966</b> | <b>0.4913</b> | 0.3356        | 0.3341        | <b>0.2861</b> | <b>0.2948</b> | 0.3028        | no        |        |
| rs113778879 | 5-58241712-C-T     | -0.0434            |         | 0.5762   | <b>0.0000</b> | <b>0.0000</b> | <b>0.0495</b> | <b>0.0000</b> |               |               |               |               |               |               | -         |        |
| rs10074269  | 5-169591460-T-C    | 0.0412             | 0.0412  | 0.3393   | 0.3463        | 0.3507        | 0.3513        | 0.3513        | 0.3305        | 0.3305        | 0.3389        | 0.3389        | <b>0.2709</b> | <b>0.2709</b> | no        |        |
| rs543824204 | 6-20537845-CA-C    | -0.0391            | -0.0391 | 0.4741   | <b>0.2802</b> | <b>0.2904</b> | 0.5000        | 0.5000        | 0.5025        | <b>0.3069</b> | <b>0.4019</b> | 0.4952        | 0.5000        | <b>0.2649</b> | yes       |        |
| rs574103382 | 6-82263549-AAT-A   | 0.0477             |         | 0.4240   | <b>0.3391</b> | <b>0.3564</b> | <b>0.5000</b> | 0.3891        |               |               |               |               |               |               | yes       |        |
| rs73754909  | 6-87803819-T-C     | 0.0383             | 0.0383  | 0.2809   | <b>0.0000</b> | <b>0.0004</b> | <b>0.0171</b> | <b>0.0127</b> | <b>0.0708</b> | 0.2563        | <b>0.0000</b> | <b>0.3470</b> | <b>0.0020</b> | -             | -         |        |
| rs55941023  | 6-130341728-C-CT   | 0.0472             | 0.0472  | 0.7113   | 0.7414        | 0.7099        | 0.7151        | 0.7151        | 0.6914        | 0.6914        | 0.7212        | 0.7212        | <b>0.7809</b> | <b>0.7809</b> | no        |        |
| rs57589542  | see caption        | 0.0137             | 0.0137  | 0.6130   | <b>0.3908</b> | <b>0.3723</b> | <b>0.4586</b> | <b>0.3613</b> | <b>0.3943</b> | <b>0.2960</b> | <b>0.3399</b> | <b>0.3197</b> | <b>0.3506</b> | <b>0.2928</b> | yes       |        |
| rs851984    | 6-152023191-G-A    | 0.0626             | 0.0626  | 0.3938   | 0.3937        | 0.3957        | <b>0.4513</b> | <b>0.4513</b> | 0.3997        | 0.3997        | 0.3978        | 0.3978        | 0.4542        | 0.4542        | no        |        |
| rs10644978  | 7-91459189-A-ATT   | 0.0452             | 0.0452  | 0.3332   | 0.3520        | 0.3585        | <b>0.4790</b> | 0.3277        | <b>0.4635</b> | 0.3533        | 0.3329        | 0.3317        | 0.3566        | 0.3685        | yes       |        |
| rs111963714 | 7-99948655-T-G     | 0.0420             | 0.0420  | 0.2083   | <b>0.1494</b> | 0.2113        | -             | -             | <b>0.1035</b> | <b>0.1577</b> | <b>0.1490</b> | 0.2019        | 0.1793        | <b>0.0339</b> | yes       |        |
| rs5887960   | 7-139943702-CT-C   | 0.0582             | 0.0582  | 0.5378   | <b>0.4468</b> | <b>0.4330</b> | 0.5000        | <b>0.4731</b> | <b>0.4806</b> | <b>0.3844</b> | 0.5084        | <b>0.4760</b> | 0.4801        | <b>0.4084</b> | yes       |        |
| rs62485509  | 7-144048902-G-T    | -0.0563            | -0.0563 | 0.2289   | <b>0.1595</b> | 0.2255        | 0.2210        | 0.2210        | 0.2175        | <b>0.1071</b> | 0.2344        | 0.2344        | 0.2490        | 0.1753        | no        |        |
| rs3988353   | 8-17787610-CT-C    | -0.0377            | -0.0377 | 0.6217   | <b>0.546</b>  | <b>0.5479</b> | <b>0.4956</b> | <b>0.4218</b> | <b>0.5083</b> | <b>0.2445</b> | <b>0.3570</b> | <b>0.4183</b> | <b>0.4960</b> | <b>0.1534</b> | yes       |        |
| rs1511243   | 8-76230943-A-G     | 0.0755             | 0.0755  | 0.8289   | 0.8348        | 0.8376        | 0.8328        | 0.8328        | 0.8423        | 0.8423        | 0.8353        | 0.8353        | <b>0.6175</b> | 0.8486        | no        |        |
| rs10975870  | 9-6880263-A-G      | 0.0348             | 0.0348  | 0.2900   | 0.3132        | 0.2848        | 0.2950        | 0.2950        | 0.3019        | 0.3019        | 0.2531        | 0.2523        | 0.2968        | <b>0.1972</b> | no        |        |
| rs3057314   | 9-21964882-CAAAA-C | 0.0550             | 0.0550  | 0.3210   | <b>0.2011</b> | <b>0.2043</b> | <b>0.4502</b> | <b>0.1924</b> | <b>0.3026</b> | <b>0.1130</b> | <b>0.1687</b> | <b>0.0613</b> | <b>0.4183</b> | <b>0.0896</b> | yes       |        |

|             |                      |         |         |        |               |               |               |               |               |               |               |               |               |               |     |
|-------------|----------------------|---------|---------|--------|---------------|---------------|---------------|---------------|---------------|---------------|---------------|---------------|---------------|---------------|-----|
| rs4880038   | 9-36928288-T-C       | 0.0249  | 0.0249  | 0.5427 | 0.5431        | 0.544         | 0.5025        | 0.5025        | 0.5228        | 0.5228        | 0.5397        | 0.5385        | <b>0.4024</b> | 0.5080        | no  |
| rs542275778 | 10-22477776-ACC-A    | 0.1687  | 0.1687  | 0.0214 | 0.0187        | 0.0294        | <b>0.5088</b> | 0.0269        | 0.0439        | 0.0295        | <b>0.1531</b> | 0.0313        | <b>0.1474</b> | 0.0299        | no  |
| rs2384736   | 10-38523626-C-A      | 0.0404  | 0.0404  | 0.3740 | <b>0.0014</b> | 0.3996        | <b>0.0008</b> | 0.3521        | <b>0.0000</b> | <b>0.1821</b> | <b>0.0000</b> | <b>0.0842</b> | <b>0.0020</b> | <b>0.0020</b> | yes |
| rs111833376 | 10-71335574-C-T      | -0.4040 | -0.4040 | 0.3122 | <b>0.0417</b> | <b>0.0443</b> | <b>0.2479</b> | 0.2664        | <b>0.2552</b> | <b>0.1147</b> | <b>0.0213</b> | 0.3059        | <b>0.0558</b> | <b>0.2231</b> | yes |
| rs140936696 | 10-95292187-CAA-C    | -0.0512 | -0.0512 | 0.8177 | 0.7677        | <b>0.7742</b> | -             | -             | <b>0.4472</b> | <b>0.1889</b> | 0.8239        | <b>0.4748</b> | <b>0.4821</b> | <b>0.2590</b> | yes |
| rs9421410   | 10-123095209-G-A     | -0.0538 | -0.0538 | 0.3246 | 0.3247        | 0.3170        | 0.3076        | 0.3076        | <b>0.2740</b> | <b>0.2732</b> | 0.3053        | 0.3053        | <b>0.2590</b> | -             | no  |
| rs35054928  | 10-123340431-GC-G    | -0.2408 | -0.2408 | 0.5971 | 0.5747        | 0.6028        | 0.5798        | 0.5798        | 0.5531        | 0.5531        | <b>0.5216</b> | <b>0.5216</b> | 0.5418        | 0.5438        | no  |
| rs199504893 | 11-108267402-C-CA    | -0.0022 |         | 0.4168 | 0.4526        | 0.4362        | 0.3879        | <b>0.3143</b> |               |               |               |               |               |               | no  |
| rs11049431  | 12-28347382-C-T      | -0.0521 | -0.0521 | 0.2151 | 0.1997        | 0.2053        | -             | -             | 0.2091        | 0.2082        | 0.1719        | 0.1719        | 0.1693        | <b>0.1175</b> | no  |
| rs1027113   | 12-29140260-G-A      | 0.0647  | 0.0647  | 0.9124 | 0.9109        | 0.9195        | 0.9118        | 0.9118        | 0.9266        | 0.9266        | 0.9171        | 0.9171        | <b>0.7649</b> | 0.9024        | no  |
| rs144767203 | 15-100905819-A-C     | -0.0608 | -0.0608 | 0.1072 | 0.0934        | 0.1043        | -             | -             | 0.1098        | 0.1037        | 0.1361        | 0.1370        | 0.0837        | <b>0.0199</b> | no  |
| rs57920543  | 16-4008542-CAAAAA-C  | 0.0550  | 0.0550  | 0.8194 | <b>0.7457</b> | <b>0.7011</b> | <b>0.5218</b> | <b>0.4664</b> | <b>0.4662</b> | <b>0.4123</b> | 0.7942        | <b>0.4189</b> | <b>0.4761</b> | <b>0.4442</b> | yes |
| rs12709163  | 16-6963972-C-G       | 0.0354  | 0.0354  | 0.7915 | 0.7572        | 0.7660        | 0.7840        | 0.7840        | 0.7993        | 0.7993        | 0.7788        | 0.7788        | <b>0.6932</b> | 0.7988        | no  |
| rs9931038   | 16-85145977-T-C      | -0.0211 | -0.0211 | 0.4851 | <b>0.5431</b> | 0.5110        | 0.4824        | 0.4824        | 0.4730        | 0.4730        | 0.4736        | 0.4736        | 0.4940        | 0.4940        | no  |
| rs79461387  | 17-29168077-G-T      | -0.0568 | -0.0568 | 0.2573 | <b>0.0000</b> | 0.2567        | <b>0.0253</b> | 0.2613        | <b>0.0253</b> | 0.2395        | <b>0.0000</b> | 0.2519        | -             | -             | -   |
| rs71363517  | 17-43212339-C-CT     | 0.0438  | 0.0438  | 0.2273 | 0.2256        | 0.2128        | -             | -             | <b>0.4978</b> | 0.2142        | 0.2110        | 0.2028        | <b>0.2928</b> | 0.2012        | no  |
| rs2668667   | 17-44283858-G-A      | -0.0540 | -0.0540 | 0.1919 | <b>0.0805</b> | 0.1872        | -             | -             | 0.1990        | <b>0.1433</b> | 0.1827        | 0.1827        | 0.1813        | <b>0.0876</b> | yes |
| rs1111207   | 18-24125857-T-C      | 0.0346  | 0.0346  | 0.4243 | 0.4267        | 0.4135        | 0.4294        | 0.4294        | 0.4283        | 0.4283        | 0.4339        | 0.4339        | <b>0.3267</b> | 0.4104        | no  |
| rs140702307 | 19-19517054-C-CGGGCG | 0.0437  | 0.0437  | 0.3525 | 0.3405        | 0.3504        | 0.3655        | <b>0.2941</b> | 0.3499        | 0.3533        | 0.3413        | <b>0.2692</b> | 0.3386        | 0.3247        | no  |
| rs66987842  | 22-40904707-CT-C     | 0.1148  | 0.1148  | 0.1068 | 0.1207        | 0.1195        | 0.1210        | 0.1288        | <b>0.1757</b> | 0.1349        | 0.1142        | 0.1166        | 0.1414        | 0.1016        | no  |

|             |                   |        |                                                           |        |        |
|-------------|-------------------|--------|-----------------------------------------------------------|--------|--------|
| rs12406858  | 1-118141492-A-C   | 0.2654 | Proxy rs1966228                                           | 0.2622 | 0.3064 |
| rs11693806  | 2-218292158-C-G   | 0.7289 | Proxy rs3821098                                           | 0.7422 | 0.7443 |
| rs34207738  | 3-141112859-CTT-C | 0.4205 | Summing up the AFs of deletions of two and three thymines | 0.4344 | 0.4167 |
| rs10074269  | 5-169591460-T-C   | 0.3393 | Proxy rs4562056                                           | 0.3414 | 0.3511 |
| rs73754909  | 6-87803819-T-C    | 0.2809 | Alternative allele rs77846138*                            | 0.2846 | 0.2578 |
|             |                   |        | Proxy rs12664322                                          | 0.2849 | 0.2791 |
| rs55941023  | 6-130341728-C-CT  | 0.7113 | Proxy rs1415700                                           | 0.7049 | 0.7050 |
|             |                   |        | Proxy rs11390217                                          | 0.7058 | 0.7046 |
| rs851984    | 6-152023191-G-A   | 0.3938 | Proxy rs851983                                            | 0.3993 | 0.3965 |
| rs1511243   | 8-76230943-A-G    | 0.8289 | Proxy rs6472903                                           | 0.8294 | 0.8376 |
| rs10975870  | 9-6880263-A-G     | 0.29   | Proxy rs12380608                                          | 0.2863 | 0.2840 |
|             |                   |        | Proxy rs10975887                                          | 0.2849 | 0.2837 |
| rs4880038   | 9-36928288-T-C    | 0.5427 | Proxy rs4880039                                           | 0.5449 | 0.5436 |
|             |                   |        | Proxy rs7032313                                           | 0.5446 | 0.5440 |
| rs542275778 | 10-22477776-ACC-A | 0.0214 | Proxy rs112287594                                         | 0.0185 | 0.0270 |
| rs111833376 | 10-71335574-C-T   | 0.3122 | Summing up AFs of rs111833376 and rs753981427†            | 0.3200 | 0.3163 |
|             |                   |        | Proxy rs12769661                                          | 0.2984 | 0.2929 |
| rs9421410   | 10-123095209-G-A  | 0.3246 | Proxy rs7913694                                           | 0.3142 | 0.3110 |
|             |                   |        | Proxy rs35098964                                          | 0.3139 | 0.3099 |
| rs35054928  | 10-123340431-GC-G | 0.5971 | Proxy rs2981579                                           | 0.5908 | 0.5996 |
| rs11049431  | 12-28347382-C-T   | 0.2151 | Proxy rs11049519                                          | 0.2142 | 0.2039 |
| rs144767203 | 15-100905819-A-C  | 0.1072 | Proxy rs58855876                                          | 0.1078 | 0.1043 |
|             |                   |        | Proxy rs113438754                                         | 0.1078 | 0.1043 |
| rs12709163  | 16-6963972-C-G    | 0.7915 | Proxy rs1492386                                           | 0.7951 | 0.7684 |
| rs9931038   | 16-85145977-T-C   | 0.4851 | Proxy rs60296580                                          | 0.4903 | 0.5082 |
| rs79461387  | 17-29168077-G-T   | 0.2573 | Alternative allele rs550458309‡                           | 0.2719 | 0.0000 |
| rs2668667   | 17-44283858-G-A   | 0.1919 | Proxy rs2532237                                           | 0.1860 | 0.1957 |
|             |                   |        | Proxy rs150290194                                         | 0.1765 | 0.1858 |
| rs1111207   | 18-24125857-T-C   | 0.4243 | Proxy rs1111208                                           | 0.4249 | 0.4135 |
| rs66987842  | 22-40904707-CT-C  | 0.1068 | Proxy rs6001949                                           | 0.1003 | 0.1195 |

\*6-87094100-CAGAACTTTAAAAGATTCCTTTT-C (hg19)

†10-71335572-TCC-T (hg19)

‡17-29168076-AGAG-A (hg19)
